# Supplementary material for: Retrospective case review of missed opportunities for primary prevention of stroke and TIA in primary care: protocol paper
Source: PubMed Central journal article supplement — BMJ Open. 2014 Nov 11;4(11):e006622. doi: 10.1136/bmjopen-2014-006622 (PMC4244480; doi:10.1136/bmjopen-2014-006622), 2014-11-11
Supplement: bmjopen-2014-006622.reviewer_comments.pdf [file bmjopen-2014-006622.reviewer_comments.pdf]

## PEER REVIEW HISTORY

BMJ Open publishes all reviews undertaken for accepted manuscripts. Reviewers are asked to complete a checklist review form (<http://bmjopen.bmj.com/site/about/resources/checklist.pdf>) and are provided with free text boxes to elaborate on their assessment. These free text comments are reproduced below.

## ARTICLE DETAILS

|                            |                                                                                                                             |
|----------------------------|-----------------------------------------------------------------------------------------------------------------------------|
| <b>TITLE (PROVISIONAL)</b> | Retrospective case review of missed opportunities for primary prevention of stroke and TIA in primary care: protocol paper. |
| <b>AUTHORS</b>             | Moran, Grace; Calvert, Melanie; Feltham, Max; Marshall, Tom                                                                 |

This article was not externally reviewed at BMJ Open. Protocols that have been independently assessed prior to submission to BMJ Open are usually fast-tracked to publication on the grounds that further substantial changes will not be possible. This independent assessment will usually be external, independent review for both a substantial grant award from a non-commercial or government funder and ethics approval.
